# Supplementary material for: Photonic crystal enhanced laser desorption and ionization substrate for detection of stress biomarkers under atmospheric pressure
Source: Royal Society of Chemistry journal article supplement (doi:10.1039/c8tb02855a), 2019-01-01
Supplement: c8tb02855a1.pdf [file c8tb02855a1.pdf]

Supporting Information for

# Photonic Crystal Enhanced Laser Desorption and Ionization Substrate for Stress Biomarkers Detection Under Atmospheric Pressure

Shan Chen,<sup>1</sup> Liuyang Guo,<sup>1</sup> Muhuo Ji,<sup>3</sup> Jialun Chen,<sup>1</sup> Panmiao Liu,<sup>1</sup> Hailong Ding,<sup>1</sup>

Dan Qi,<sup>1</sup> Zhuoying Xie,<sup>1,2,\*</sup> Zhongze Gu<sup>1,\*</sup>

<sup>1</sup>State Key Laboratory of Bioelectronics, School of Biological Science and Medical Engineering, Southeast University, Nanjing, 210096, China

<sup>2</sup>National Demonstration Center for Experimental Biomedical Engineering Education, Southeast University, Nanjing, 210096, China

<sup>3</sup>Department of Anesthesiology, Zhongda Hospital, Southeast University, Nanjing, China, 210096

## Contents

|                                                                    |           |
|--------------------------------------------------------------------|-----------|
| <b>1. Results and discussion</b> .....                             | <b>S2</b> |
| <b>1.1. The schematic diagram of preparation process</b> .....     | <b>S2</b> |
| <b>1.2. Characterization of PS photonic crystal template</b> ..... | <b>S2</b> |
| <b>1.3. The image of the SALDI-QTRAP400 MS system</b> .....        | <b>S4</b> |
| <b>1.4. Mass spectra of Arg at different laser intensity</b> ..... | <b>S4</b> |
| <b>1.5 Mass spectra of rats serum samoles</b> .....                | <b>S5</b> |
| <b>1.6 Mass spectra of rats serum samoles</b> .....                | <b>S6</b> |

## 1. Results and discussion

### 1.1 The schematic diagram of preparation process

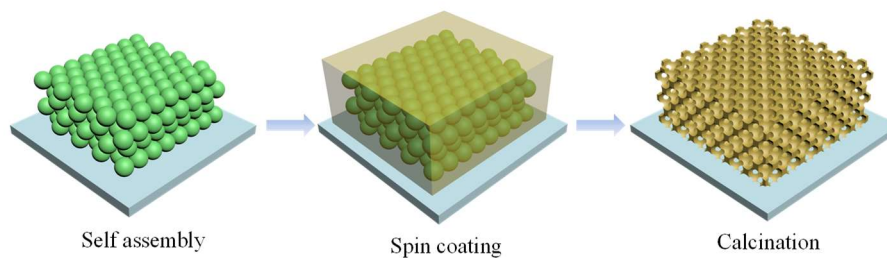

Fig.S1 The preparation of WO<sub>3</sub>-TiO<sub>2</sub> inverse opal photonic crystals

### 1.2. Characterization of PS photonic crystal template

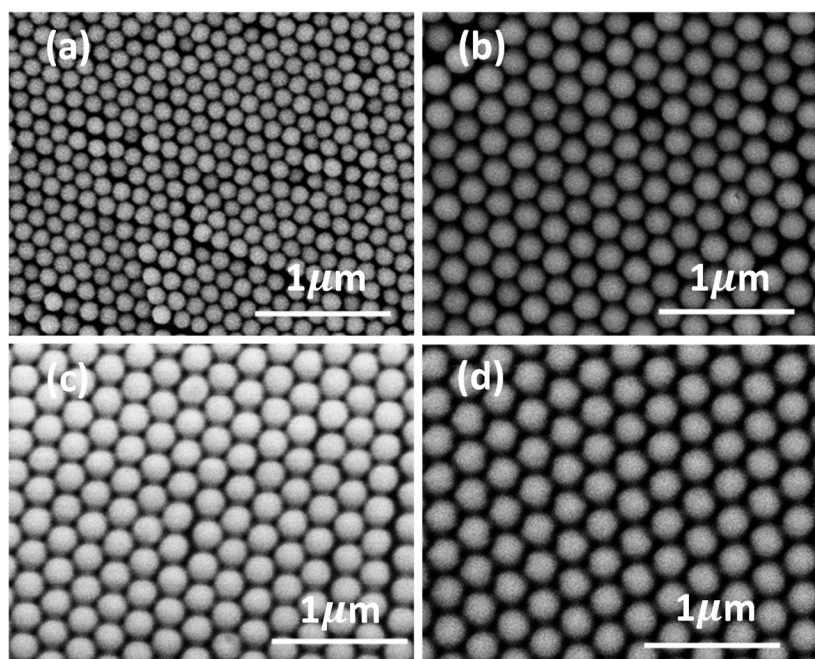

Fig.S2 SEM of PS photonic crystal templates. (a)  $\Phi_{PS}=195\text{nm}$ ; (b)  $\Phi_{PS}=230\text{nm}$ ; (c)  $\Phi_{PS}=270\text{nm}$ ; (d)  $\Phi_{PS}=330\text{nm}$ .

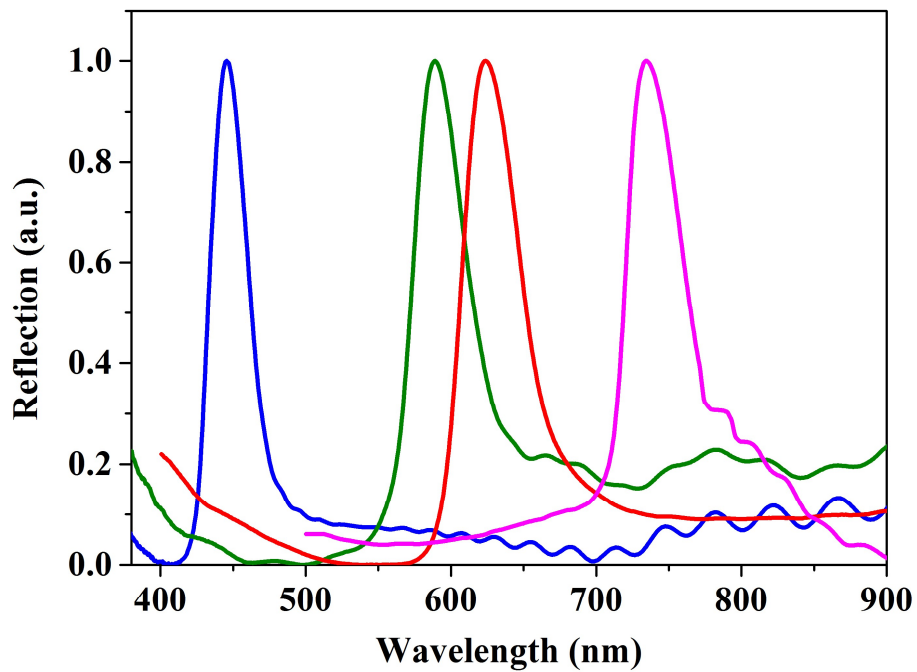

Fig.S3 Reflectance spectra of PS photonic crystal templates with PS particle diameters of 195, 230, 270, 330 nm.

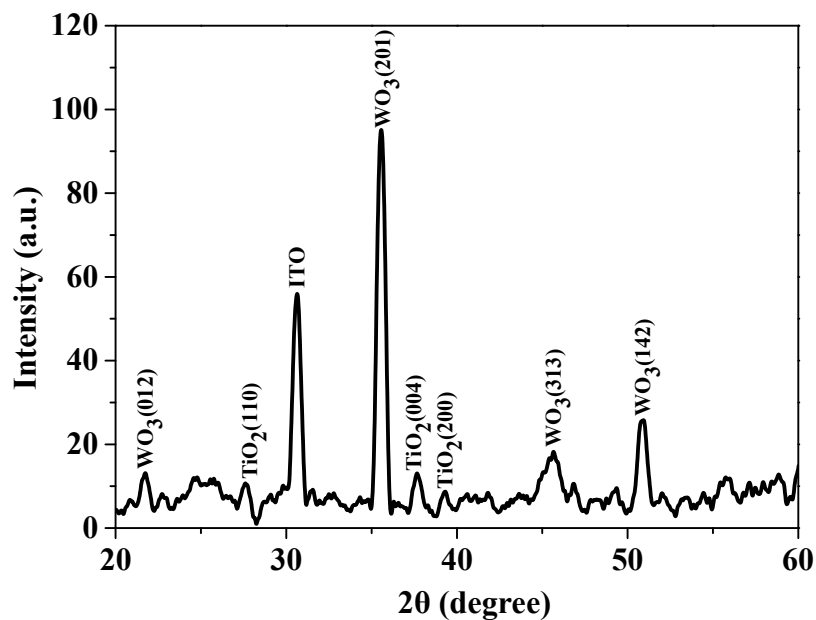

Fig.S4 XRD pattern of the  $\text{WO}_3$ - $\text{TiO}_2$  inverse opal photonic crystal films.

### 1.3. The image of the SALDI-QTRAP400 MS system

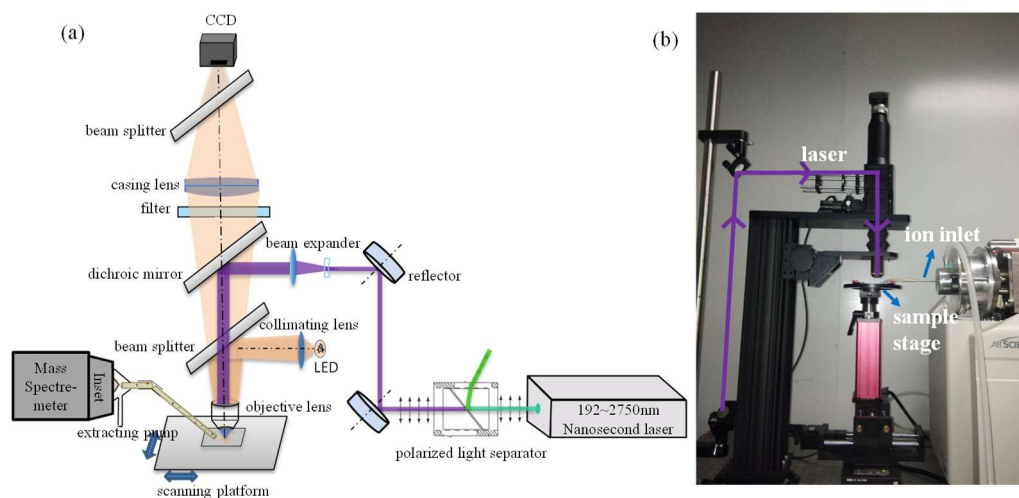

Fig.S5 (a) The schematic diagram of the SALDI-QTRAP400 MS system; (b) The actual image of the SALDI-QTRAP400 MS system.

The laser path was comprised of the Nd:YAD nanosecond laser, a polarizing beam splitter, reflectors, a dichroic mirror and an objective lens, which focused the laser on the sample. Thus, the analytes were desorbed and ionized. And the produced ions were introduced to the mass spectrometer for mass analysis.

### 1.4. Mass spectrometry of Arg at different laser intensity

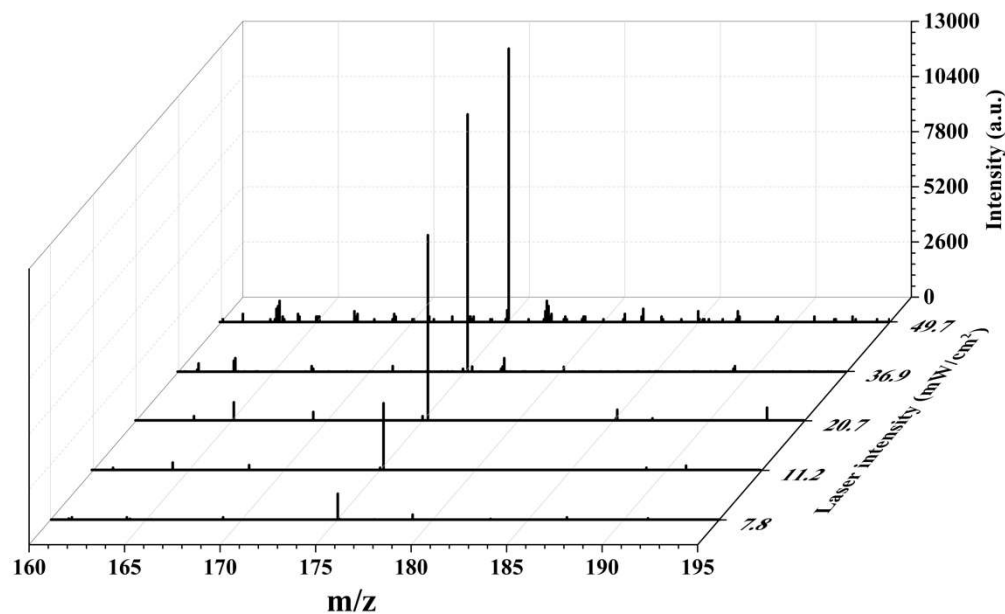

Fig.S6 Mass spectra of the protonated molecule generated at different laser intensity by using Iopal-195 as substrate.

## 1.5 Mass spectra of rats serum samples

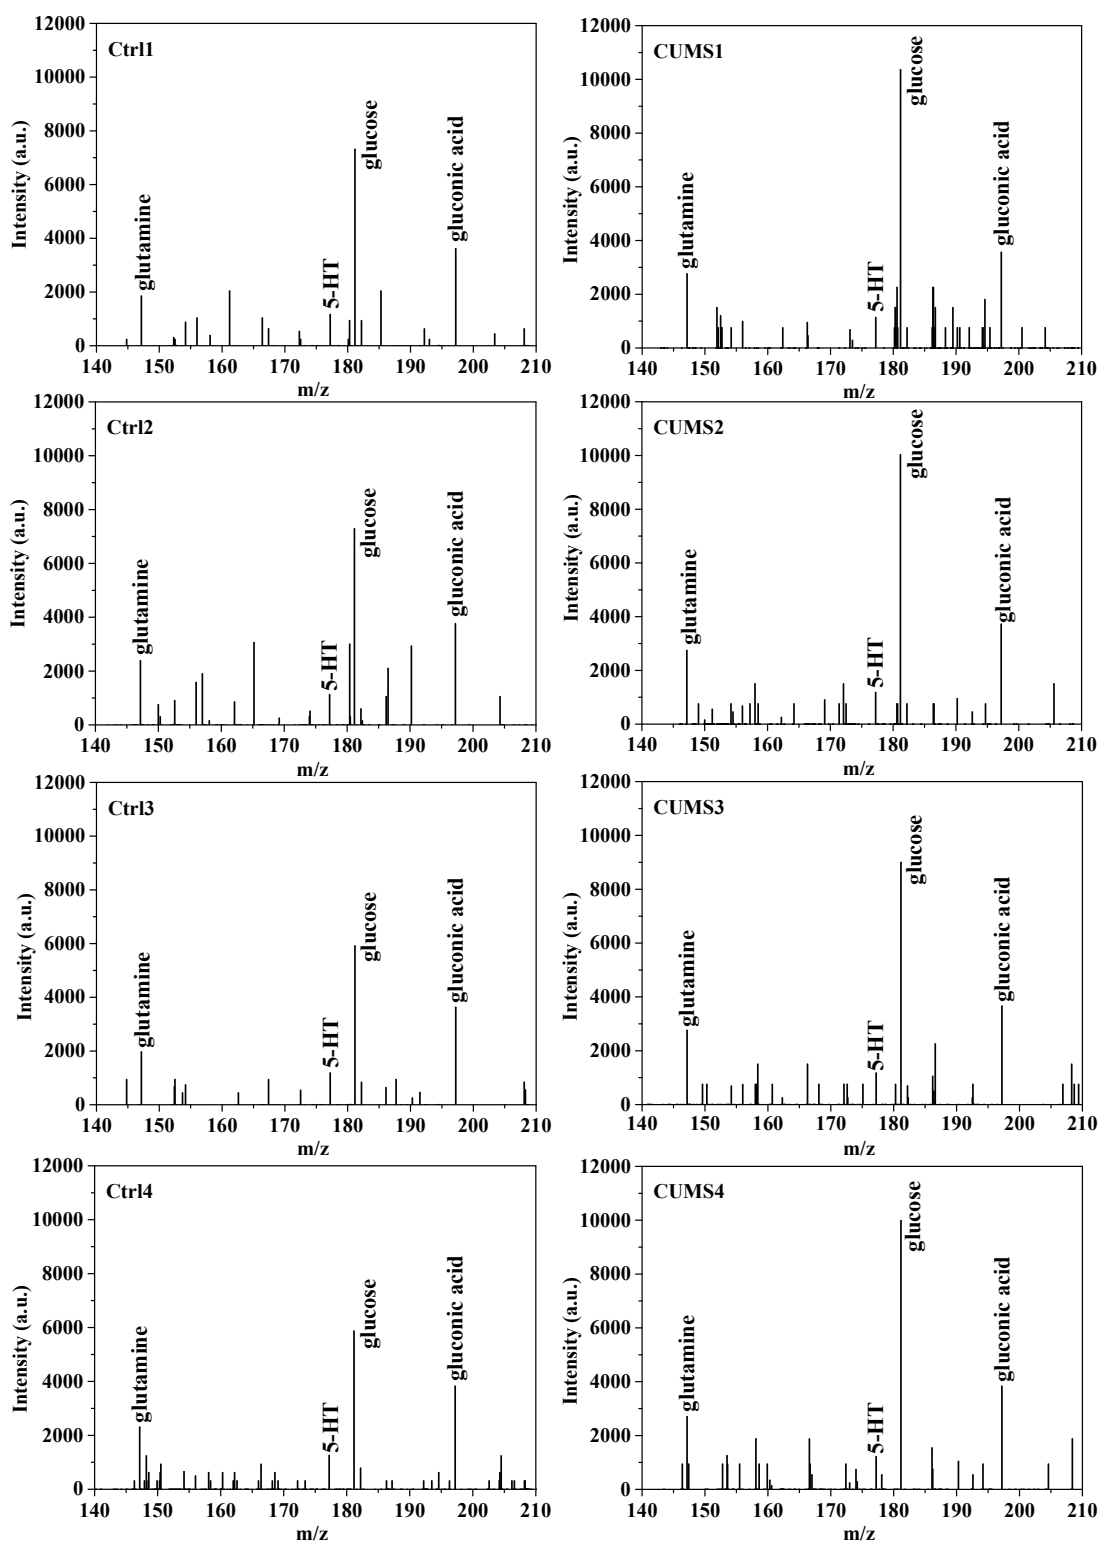

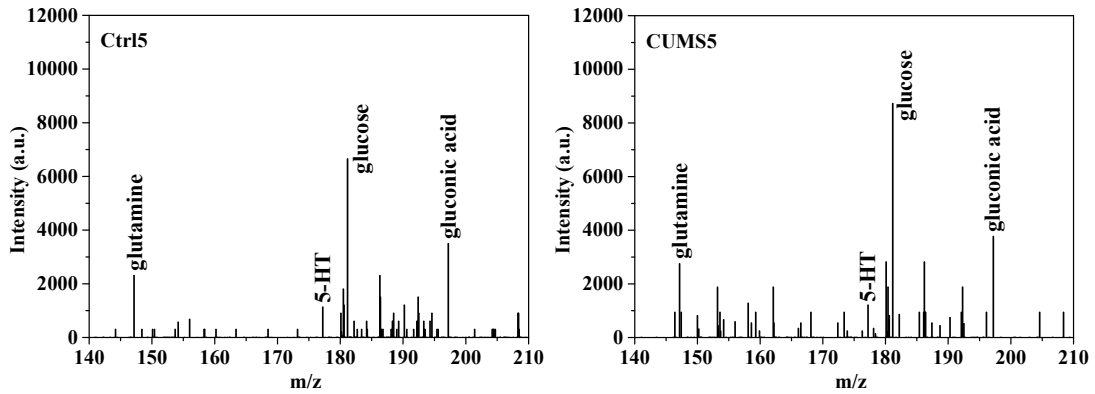

Fig.S7 Mass spectra of the serum samples containing internal standard (Ctrl: control group, CUMS: CUMS model group)

### 1.6 Reliability verification of the SALDI analysis

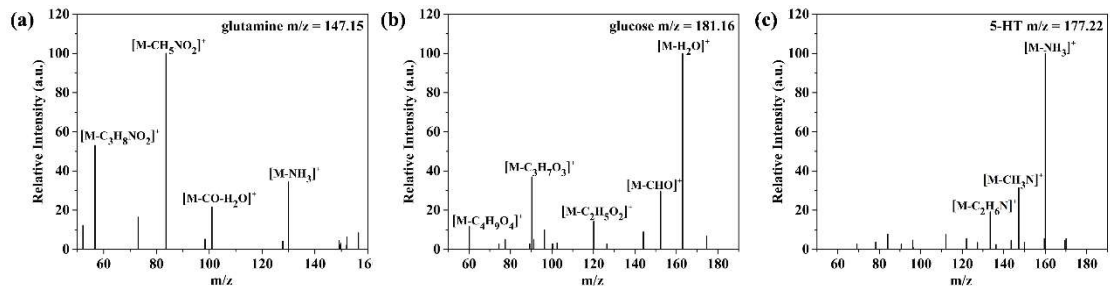

Fig.S8 The MS/MS spectra of (a) glutamine; (b) glucose; (c) 5-HT.

As shown in Figure S8, the MS/MS spectra of three ionized molecules were obtained. And, the scanning results confirmed the reliability of three ionized molecules.

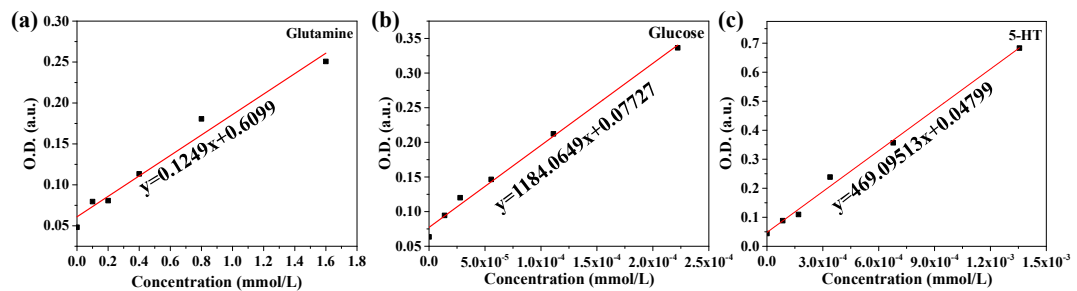

Fig.S9 The standard curve of each CUMS markers.

Table S1 The comparison of quantitative results between SALDI analysis and ELISA kit

|                    | glutamine            | glucose              | 5-HT                 |
|--------------------|----------------------|----------------------|----------------------|
| SALDI analysis     | 0.681 ± 0.052 mmol/L | 7.214 ± 0.621 mmol/L | 0.029 ± 0.003 mmol/L |
| ELISA kit          | 0.732 ± 0.064 mmol/L | 6.285 ± 0.593 mmol/L | 0.025 ± 0.004 mmol/L |
| quantitation error | 7.49%                | 12.88%               | 13.79%               |

In order to assess the performance of the proposed method, the biomarkers levels of the control group-1 serum sample was detected using the traditional method, which is enzyme-linked immunosorbent assay (ELISA) kit detection method. The glutamine ELISA kit (YX-071214M), glucose ELISA kit (YX-071221M) and 5-hydroxytryptamine ELISA kit (YX-050820M) were purchased from HePeng Biotech (Shanghai, China). The standard curve of each CUMS markers was generated by plotting the average O.D. (450nm) obtained for each of the six standard concentrations on the vertical (Y) axis versus the corresponding concentration on the horizontal (X) axis (Figure S9). Then, the concentration of each markers in diluted serum sample was calculated from the O.D. value according to the curve. Finally, the concentration of each markers in original serum sample was calculated by multiplying the concentration by corresponding dilution factor. The calculation result showed that the concentrations of glutamine, glucose and 5-hydroxytryptamine were 0.732mmol/L, 6.285mmol/L and 0.025mmol/L, respectively. And the results indicated that the quantitation error of the SALDI analysis was within 15%. The quantitation error was calculated by  $\frac{|C_{SALDI}-C_{ELISA}|}{C_{SALDI}}$ , where  $C_{SALDI}$  and  $C_{ELISA}$  were the biomarker concentrations detected by SALDI analysis and ELISA kit, respectively.

Table S2 The comparison between current method and MALDI &amp; SELDI

|                                         | sample preparation                           | salt tolerance | low-mass region interference | mechanism                 |
|-----------------------------------------|----------------------------------------------|----------------|------------------------------|---------------------------|
| CHCA/DHB <sup>1</sup>                   | co-crystallization                           | bad            | strong                       | light absorption          |
| metallic nanoparticles <sup>2, 3</sup>  | matrix was deposited with analytes solution  | good           | very little                  | localized surface plasmon |
| WO <sub>3</sub> -TiO <sub>2</sub> IOPCs | analytes solution was dripped onto substrate | good           | very little                  | slow photon effect        |

## Reference

- 1 Y. Fukuyama, *Mass Spectrom.*, 2015, 4, A0037.
- 2 S. D. Sherrod, A. J. Diaz, W. K. Russell, P. S. Cremer and D. H. Russell, *Anal. Chem.*, 2008, 80, 6796-6799.
- 3 Y. Gholipour, S. L. Giudicessi, H. Nonami and R. Errabalsells, *Anal. Chem.*, 2010, 82, 5518-5526.
